# Supplementary material for: Alkaloids from Veratrum taliense Exert Cardiovascular Toxic Effects via Cardiac Sodium Channel Subtype 1.5
Source: PubMed Central journal article supplement (PMC4728534; doi:10.3390/toxins8010012), 2015-12-30
Supplement: toxins-08-00012-s001.pdf [file toxins-08-00012-s001.pdf]

# Supplementary Materials: Alkaloids from *Veratrum taliense* Exert Cardiovascular Toxic Effects via Cardiac Sodium Channel Subtype 1.5

Gan Wang, Ming-Qiang Rong, Qiong Li, Ya-Ping Liu, Cheng-Bo Long, Ping Meng, Hui-Ming Yao, Ren Lai and Xiao-Dong Luo

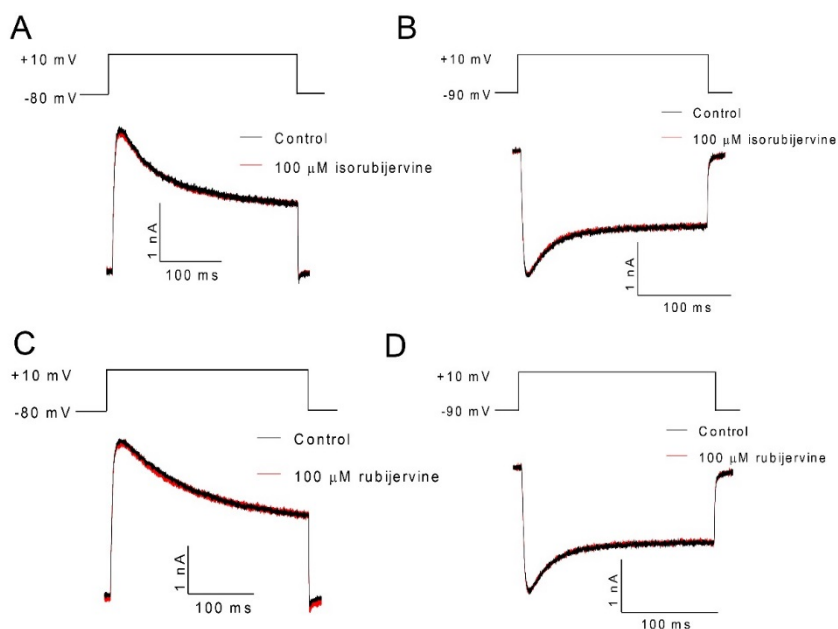

**Figure S1.** Effects of isorubijervine and rubijervine on dorsal root ganglion (DRG) neurons. Cells were evoked by a 500-ms depolarizing potential of +10 mV from a holding potential of -80 mV to record  $K_v$  currents. Cells were activated by a 150-ms step depolarization to +10 mV from a holding potential of -90 mV for  $Cav$  currents. The effects of isorubijervine (100  $\mu$ M) on DRG  $K_v$  channel currents (A) and  $Cav$  channel currents (B). Effects of 100  $\mu$ M rubijervine on DRG  $K_v$  channel currents (C) and  $Cav$  channel currents (D).

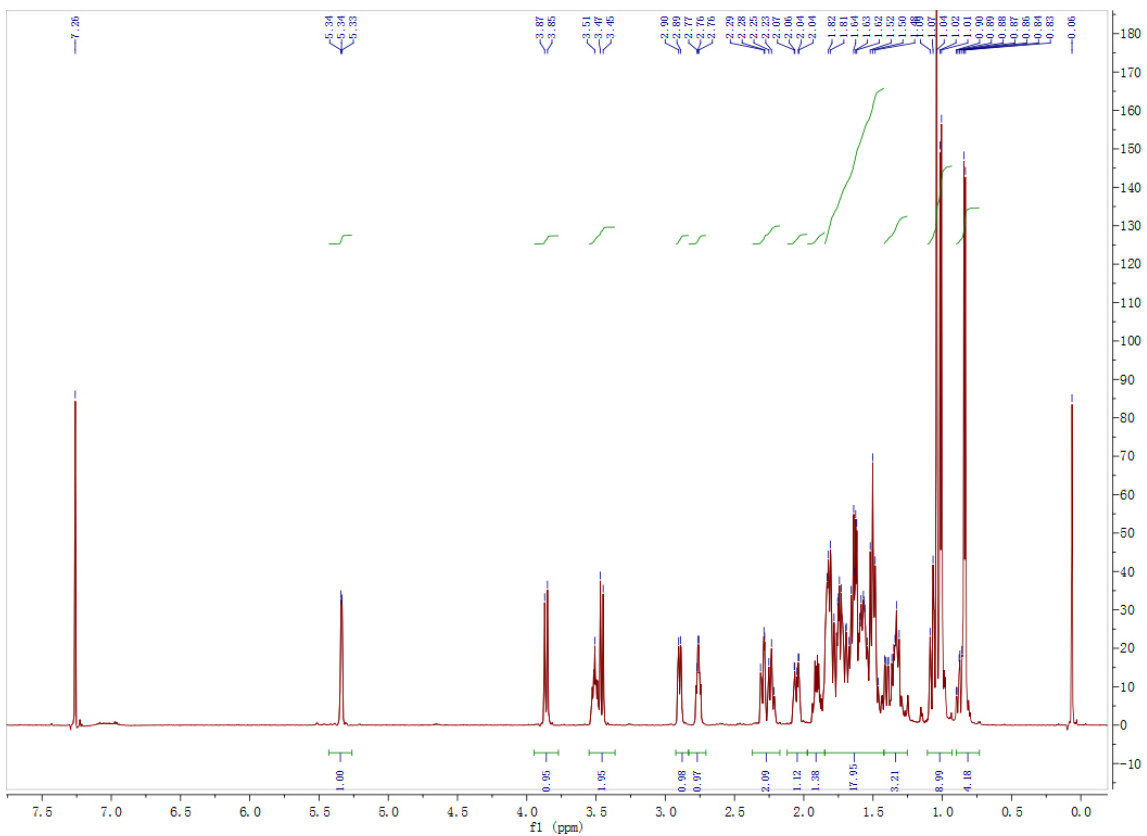

Figure S2.  $^1\text{H}$ -NMR spectrum of isorubijervine in  $\text{CDCl}_3$ .

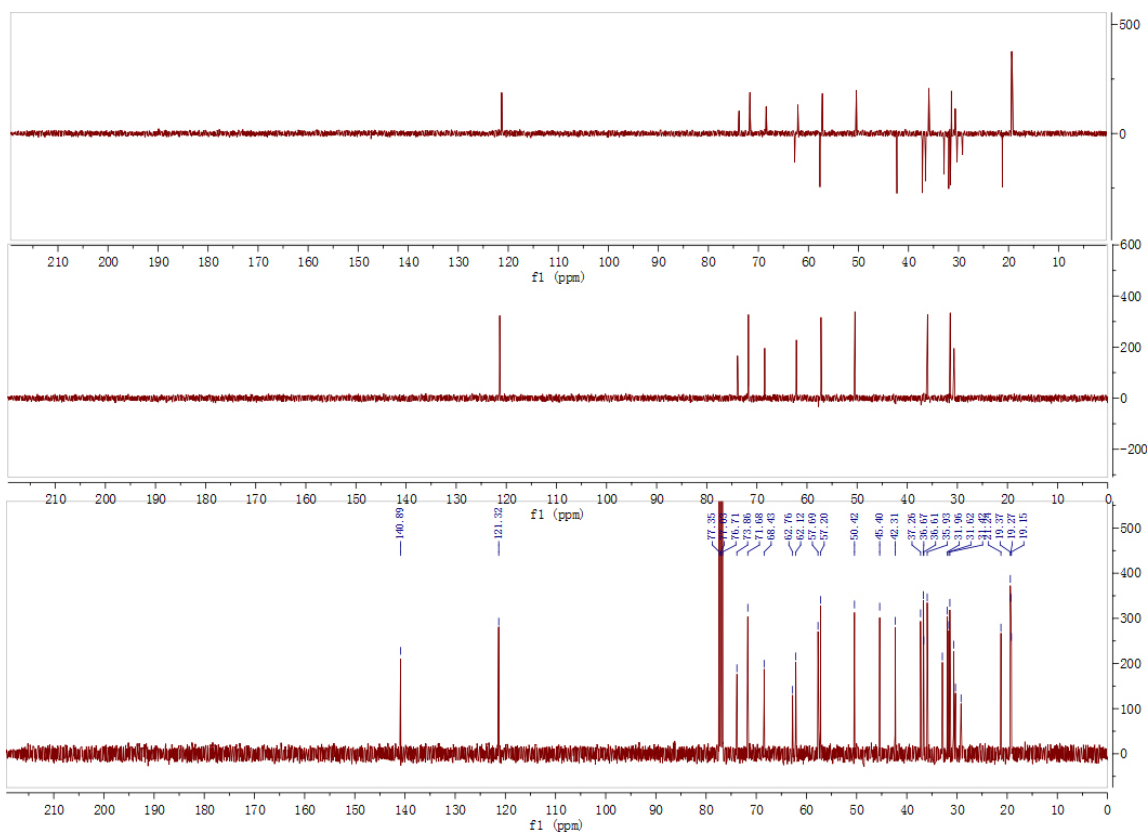

Figure S3.  $^{13}\text{C}$ -NMR spectrum of isorubijervine in  $\text{CDCl}_3$ .

**Sample Name** wvt-8      **Instrument Name** Agilent G6230 TOF MS      **User Name** KIB      **IRM Calibration Status** Success  
**Data Filename** 150505ESIA1.d      **ACQ Method** ESI.m      **Acquired Time** 5/5/2015 9:28:43 AM

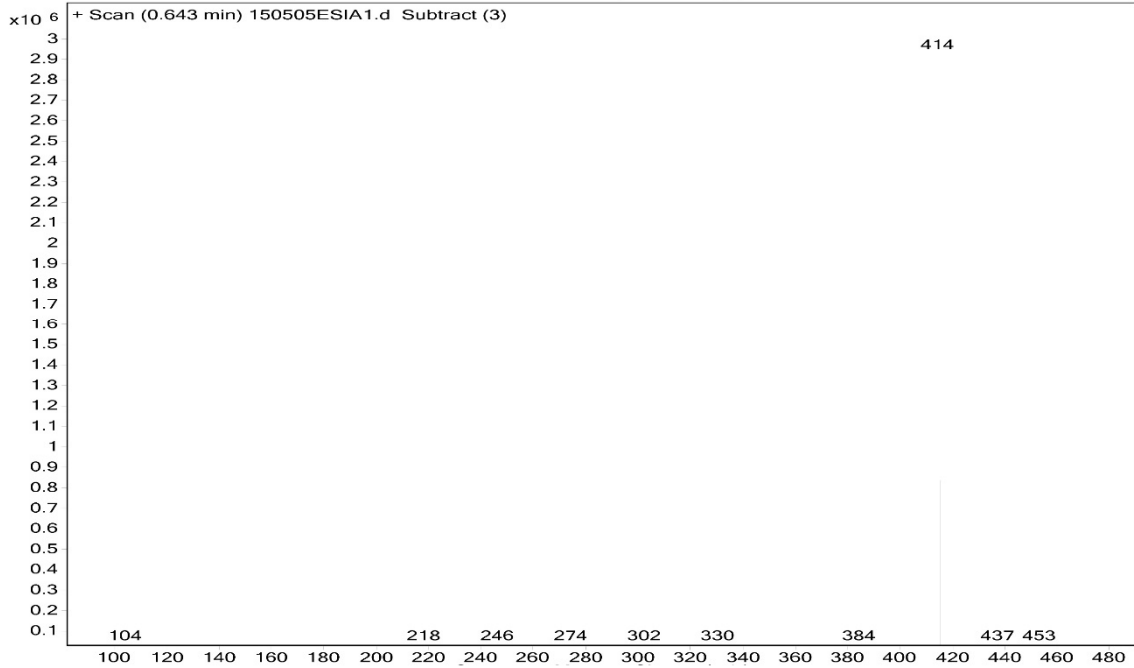

Figure S4. ESI-MS spectrum of isorubijervine.

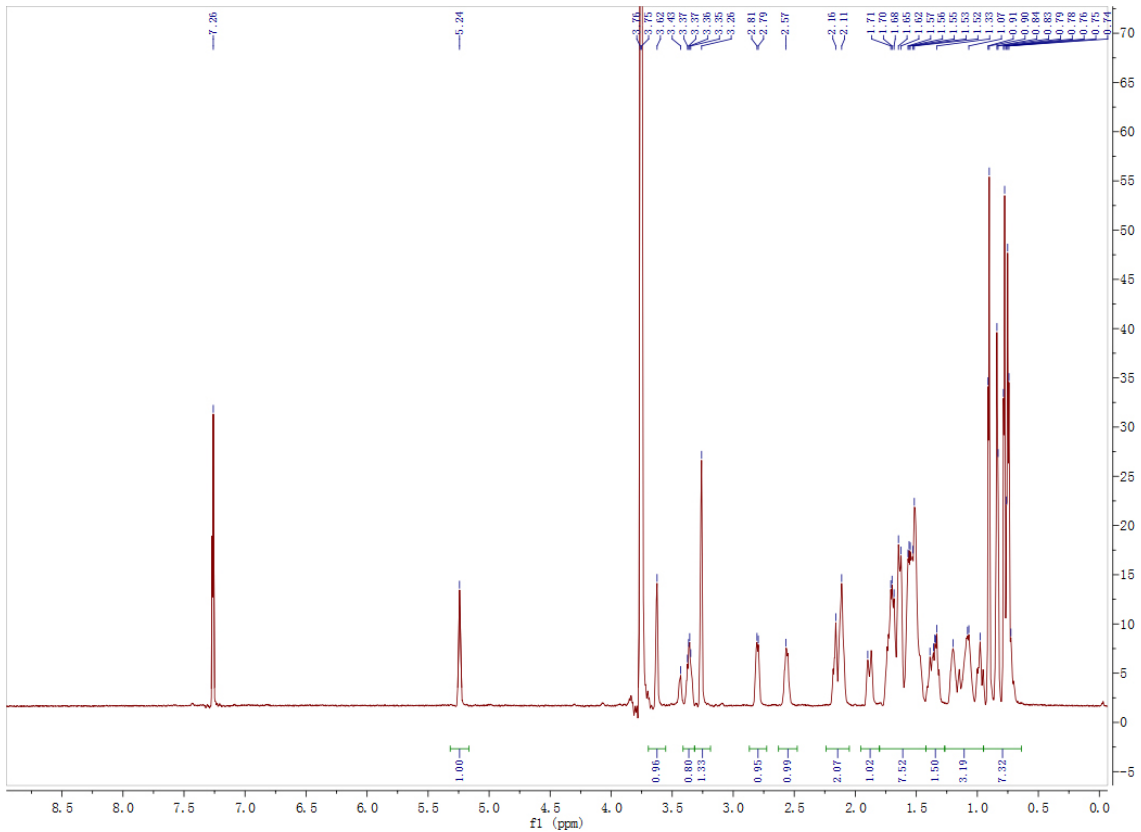

Figure S5. <sup>1</sup>H NMR spectrum of rubijervine in CDCl<sub>3</sub>.

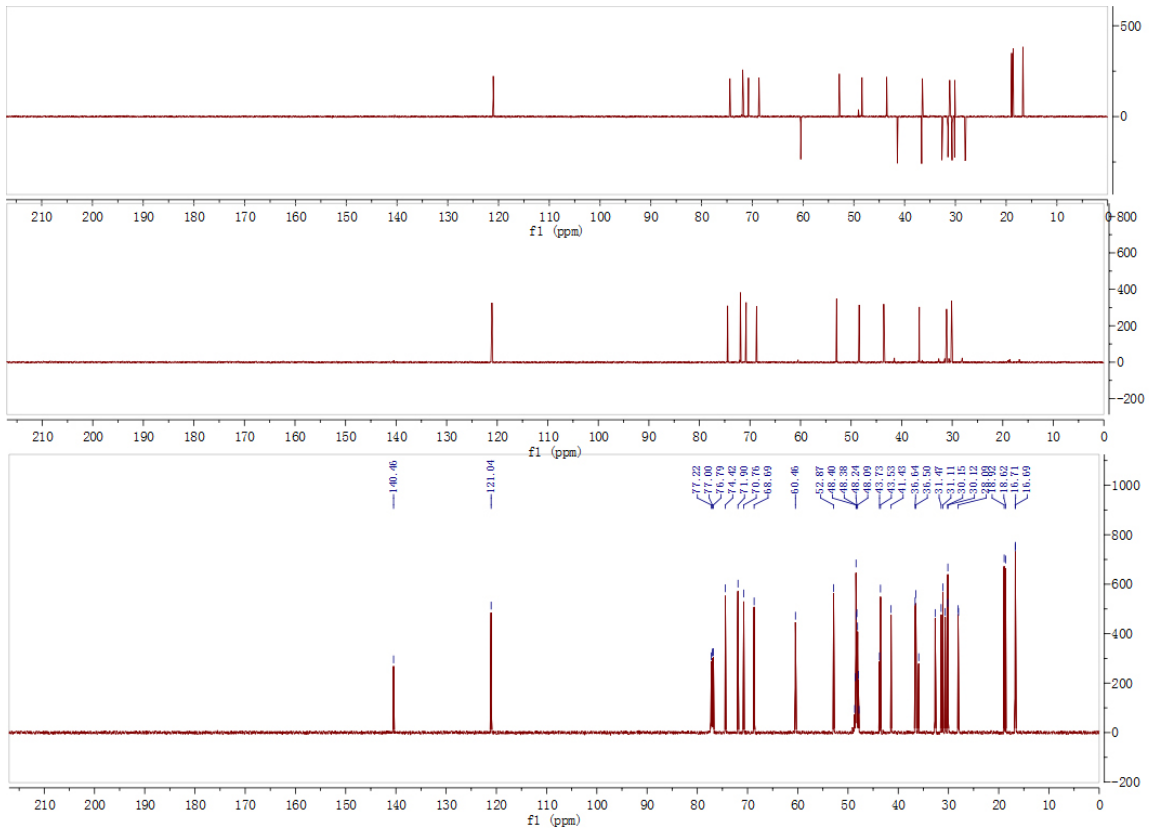

Figure S6. <sup>13</sup>C NMR spectrum of rubijervine in CDCl<sub>3</sub>.

User Spectra

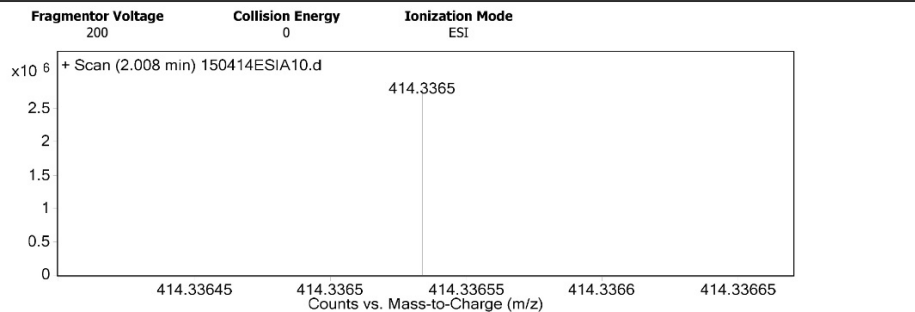

Peak List

| m/z       | z | Abund      | Formula                                          | Ion |
|-----------|---|------------|--------------------------------------------------|-----|
| 121.0509  | 1 | 11,5048.14 |                                                  |     |
| 412.3221  | 1 | 5,9188.88  |                                                  |     |
| 414.3365  | 1 | 278,6094   | C <sub>27</sub> H <sub>44</sub> N O <sub>2</sub> | M+  |
| 415.3409  | 1 | 81,8768.5  | C <sub>27</sub> H <sub>44</sub> N O <sub>2</sub> | M+  |
| 416.3438  | 1 | 12,5858.18 | C <sub>27</sub> H <sub>44</sub> N O <sub>2</sub> | M+  |
| 863.6427  | 1 | 6,4625.06  |                                                  |     |
| 922.0098  | 1 | 16,5486.72 |                                                  |     |
| 941.6582  | 1 | 6,8858.32  |                                                  |     |
| 1050.6346 | 1 | 9,9226.41  |                                                  |     |
| 1051.6375 | 1 | 6,1494.29  |                                                  |     |

Formula Calculator Element Limits

| Element | Min | Max |
|---------|-----|-----|
| C       | 0   | 200 |
| H       | 0   | 400 |
| O       | 0   | 6   |
| N       | 1   | 1   |

Formula Calculator Results

| Formula                                          | CalculatedMass | CalculatedMz | Mz       | Diff. (mDa) | Diff. (ppm) | DBE    |
|--------------------------------------------------|----------------|--------------|----------|-------------|-------------|--------|
| C <sub>27</sub> H <sub>44</sub> N O <sub>2</sub> | 414.3372       | 414.3367     | 414.3365 | -0.1        | -0.3        | 6.5000 |

--- End Of Report ---

Figure S7. high resolution electrospray ionization mass spectroscopy (HRESIMS) spectrum of rubijervine. DBE: double bond equivalents.

**Table S1.** IC<sub>50</sub> of two compound on sodium channel (μM).

| <b>Compound</b> | <b>rNav1.3</b> | <b>rNav1.4</b> | <b>hNav1.5</b> | <b>hNav1.7</b> |
|-----------------|----------------|----------------|----------------|----------------|
| Isorubijervine  | 12.17 ± 0.77   | 9.82 ± 0.84    | 6.962 ± 0.422  | -              |
| Rubijervine     | -              | 18.65 ± 1.01   | 10.81 ± 0.89   | -              |

Notes: values are given as the mean ± SE, *n* = 4; no inhibitory activity detected at a concentration up to 20 μM.
